# Supplementary material for: Chronic condition clusters and associated disability over time
Source: PubMed Central journal article supplement — J Multimorb Comorb. 2022 Apr 18;12:26335565221093569. doi: 10.1177/26335565221093569 (PMC9106307; doi:10.1177/26335565221093569), 2022-04-18
Supplement: sj-pdf-1-cob-10.1177_26335565221093569.pdf [file sj-pdf-1-cob-10.1177_26335565221093569.pdf]

| Supplemental Table 1                            |        |        |         |
|-------------------------------------------------|--------|--------|---------|
| Fit statistics for latent class analysis models |        |        |         |
| Number of classes                               | AIC    | BIC    | Entropy |
| 3                                               | 1873.7 | 2113.9 | 0.45    |
| 4                                               | 1632.5 | 1955.1 | 0.48    |
| 5                                               | 1536.5 | 1941.5 | 0.45    |
| 6                                               | 1482.9 | 1970.3 | 0.50    |

*Note.* AIC = Akaike Information Criterion, BIC = Bayesian Information Criterion (for both, lower indicates better fit. Higher entropy indicates better fit.
